# Supplementary figures and images for: A novel AAV1 variant for transduction of Japanese quail neurons in vitro and in vivo
Source: Research Square preprint supplement (doi:10.21203/rs.3.rs-1279916/v1), 2022-01-26

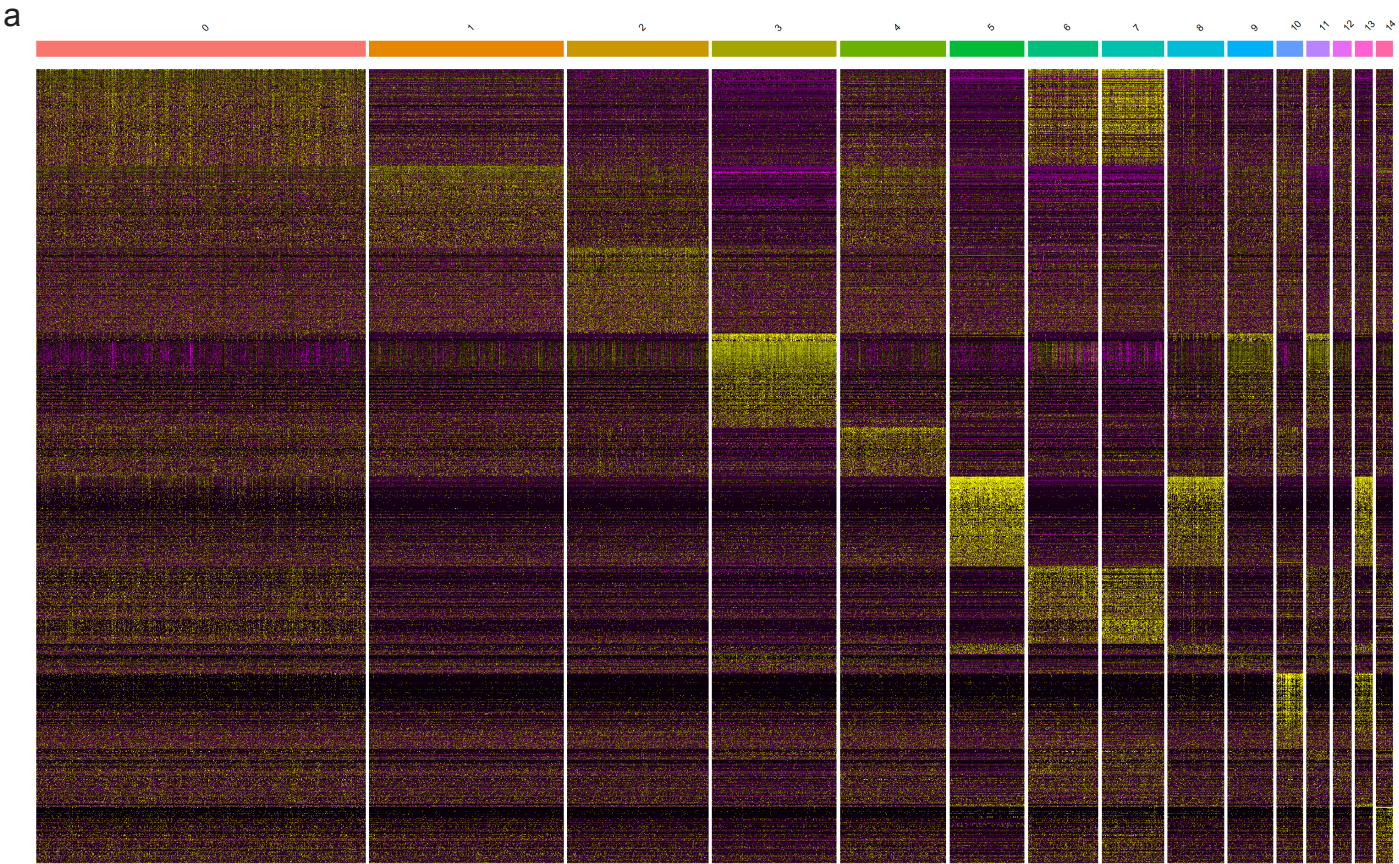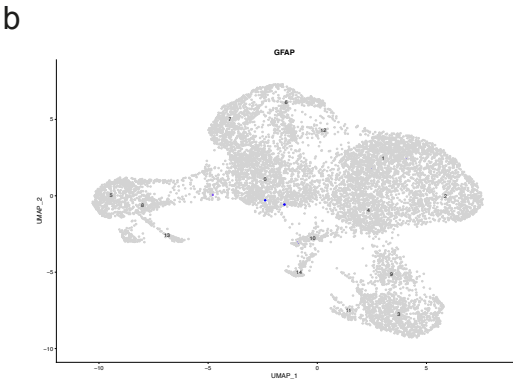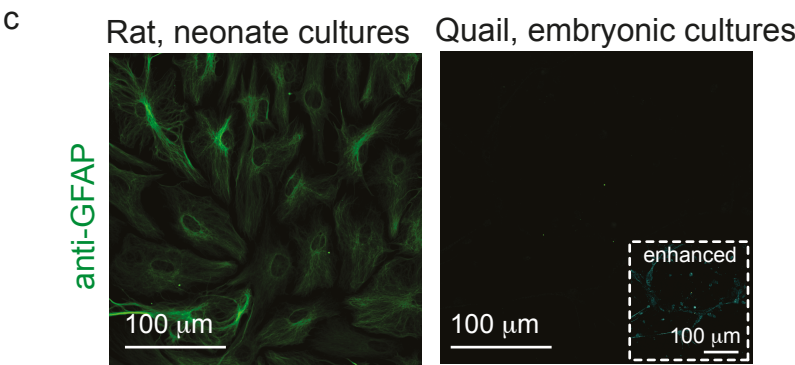

Supplement: Supplementary file 1 [file 23cfedf09da7b900d2bdb791.pdf]

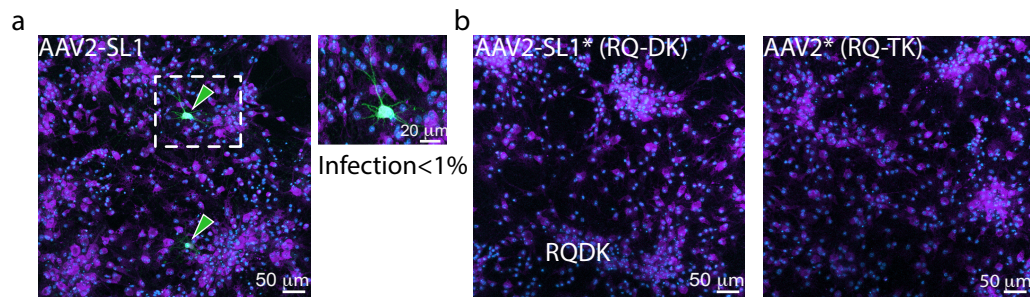

Supplement: Supplementary file 2 [file 2a040c6427614ffafcfcc237.pdf]

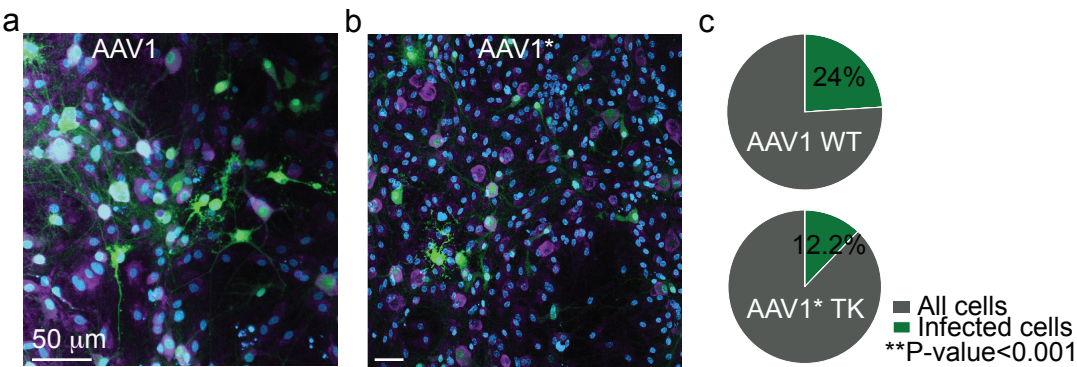

Supplement: Supplementary file 3 [file 44bf0bbc018706c30e7e29af.pdf]

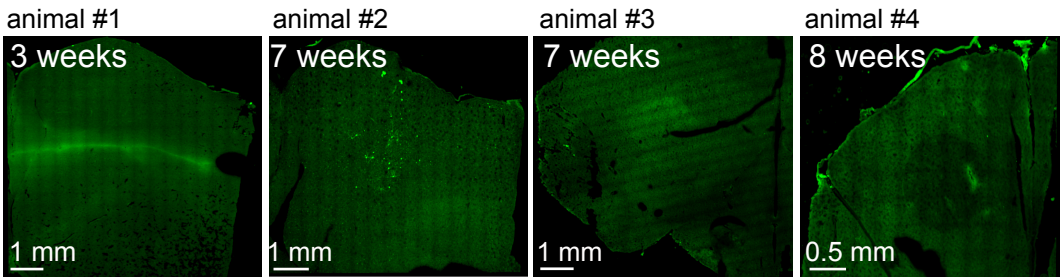

Supplement: Supplementary file 4 [file 60aafd6d64ec03e86e6d984a.pdf]

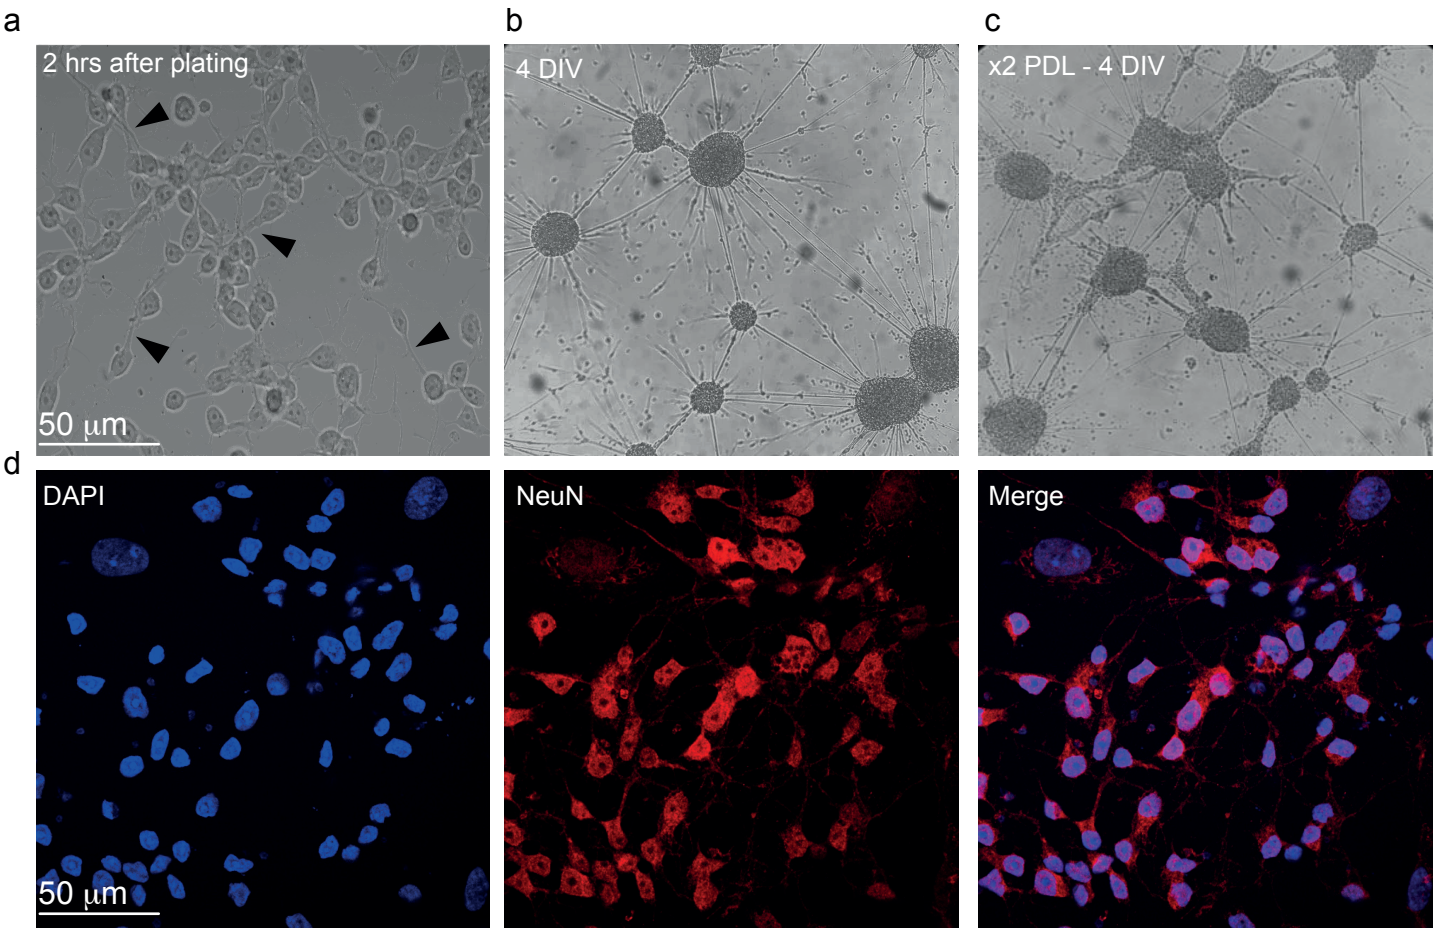

Supplement: Supplementary file 5 [file 6d8b1e2b72f39deb2ef8f43b.pdf]

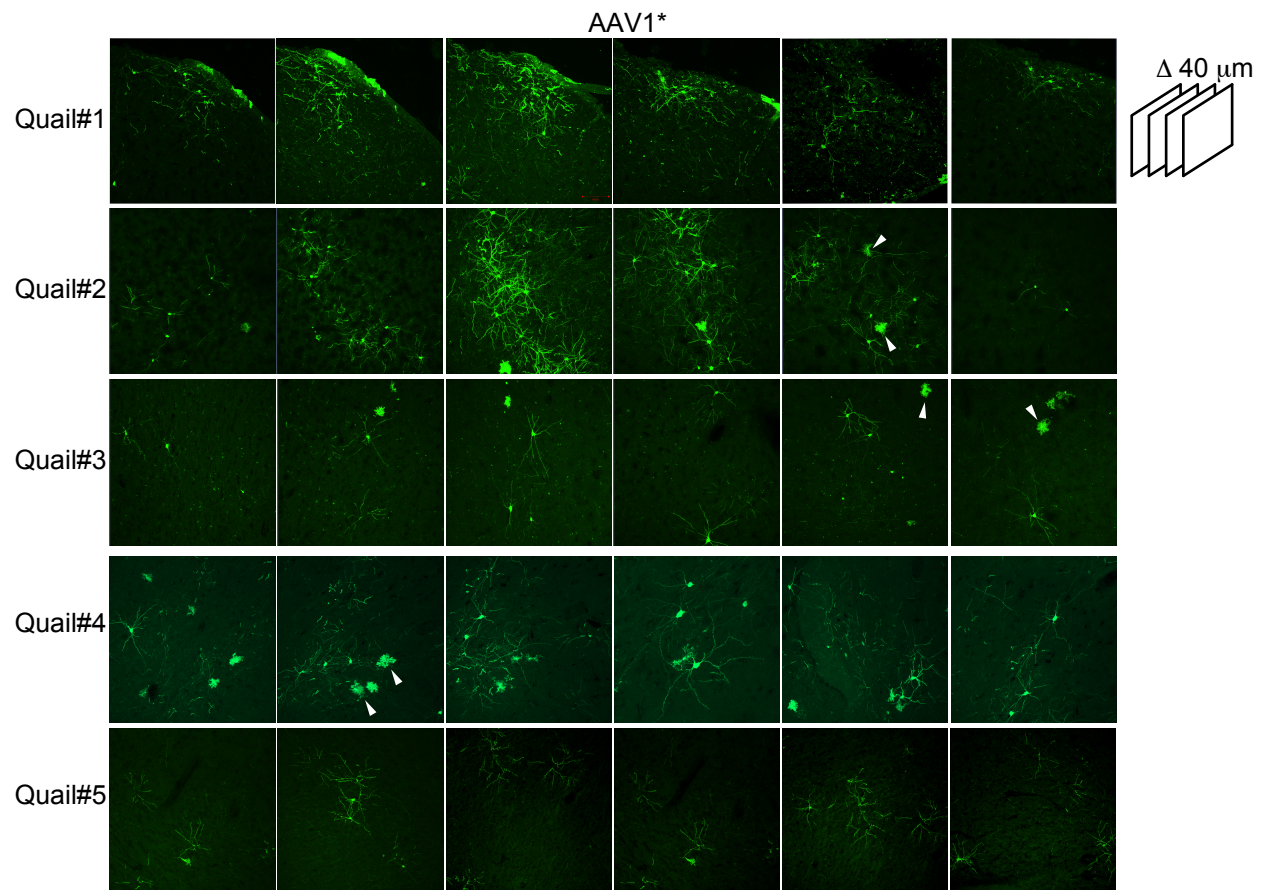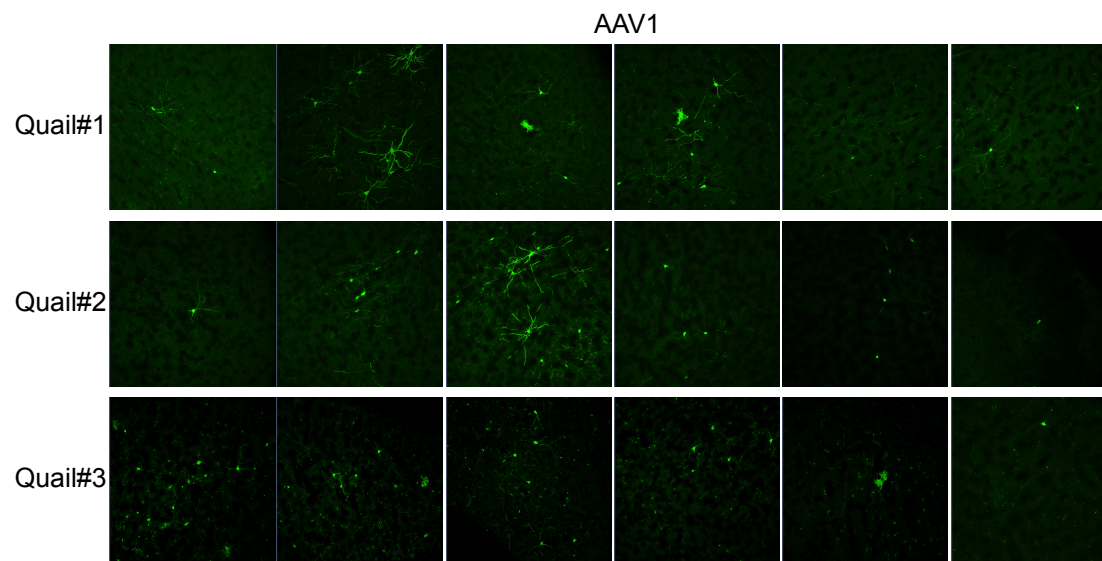

Supplement: Supplementary file 6 [file b3bf4bc9af61276ac6c163fa.pdf]
